# Supplementary material
Source: publisher figshare collection journal article supplement (https://acs.figshare.com/ndownloader/files/13269737)
Supplement: Supplementary file 1 [file 13269737]

## Supporting Information

**Predicting the Initial Thermal Decomposition Path of Nitrobenzene  
Caused by Mode Vibration at Moderate-Low Temperatures:  
Temperature-Dependent Anti-Stokes Raman Spectra Experiments  
and First-Principals Calculations**

Yajing Peng<sup>1</sup>, Xianming Xiu<sup>1</sup>, Gangbei Zhu<sup>2</sup>, and Yanqiang Yang<sup>2\*</sup>

<sup>1</sup> *Department of Physics, Bohai University, Jinzhou, 121013, China*

<sup>2</sup> *Institute of fluid physics, Chinese Academy of Engineering Physics, Chengdu,  
610000, China*

---

\* Corresponding author: [yqyang@hit.edu.cn](mailto:yqyang@hit.edu.cn)

### IRC determination for the transition state of isomerization

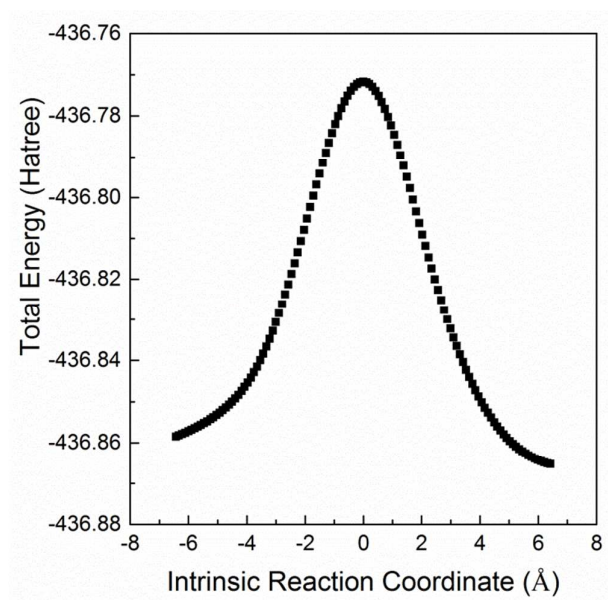

Figure S1. The IRC path of the transition state leading the nitrobenzene to the isomer phenyl nitrite.
